# Supplementary material for: Discovery of Pyrazolo[4,3-c]quinolines Derivatives as Potential Anti-Inflammatory Agents through Inhibiting of NO Production
Source: MDPI journal article supplement (doi:10.3390/molecules23051036), 2018-04-28

AP-2-OMe-An

Mercury-400BB "Mercuryplus400"  
Date: Oct 8 2008  
Solvent: DMSO  
Ambient temperature  
Total 36 repetitions

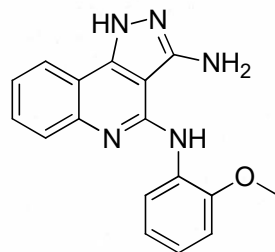

2c

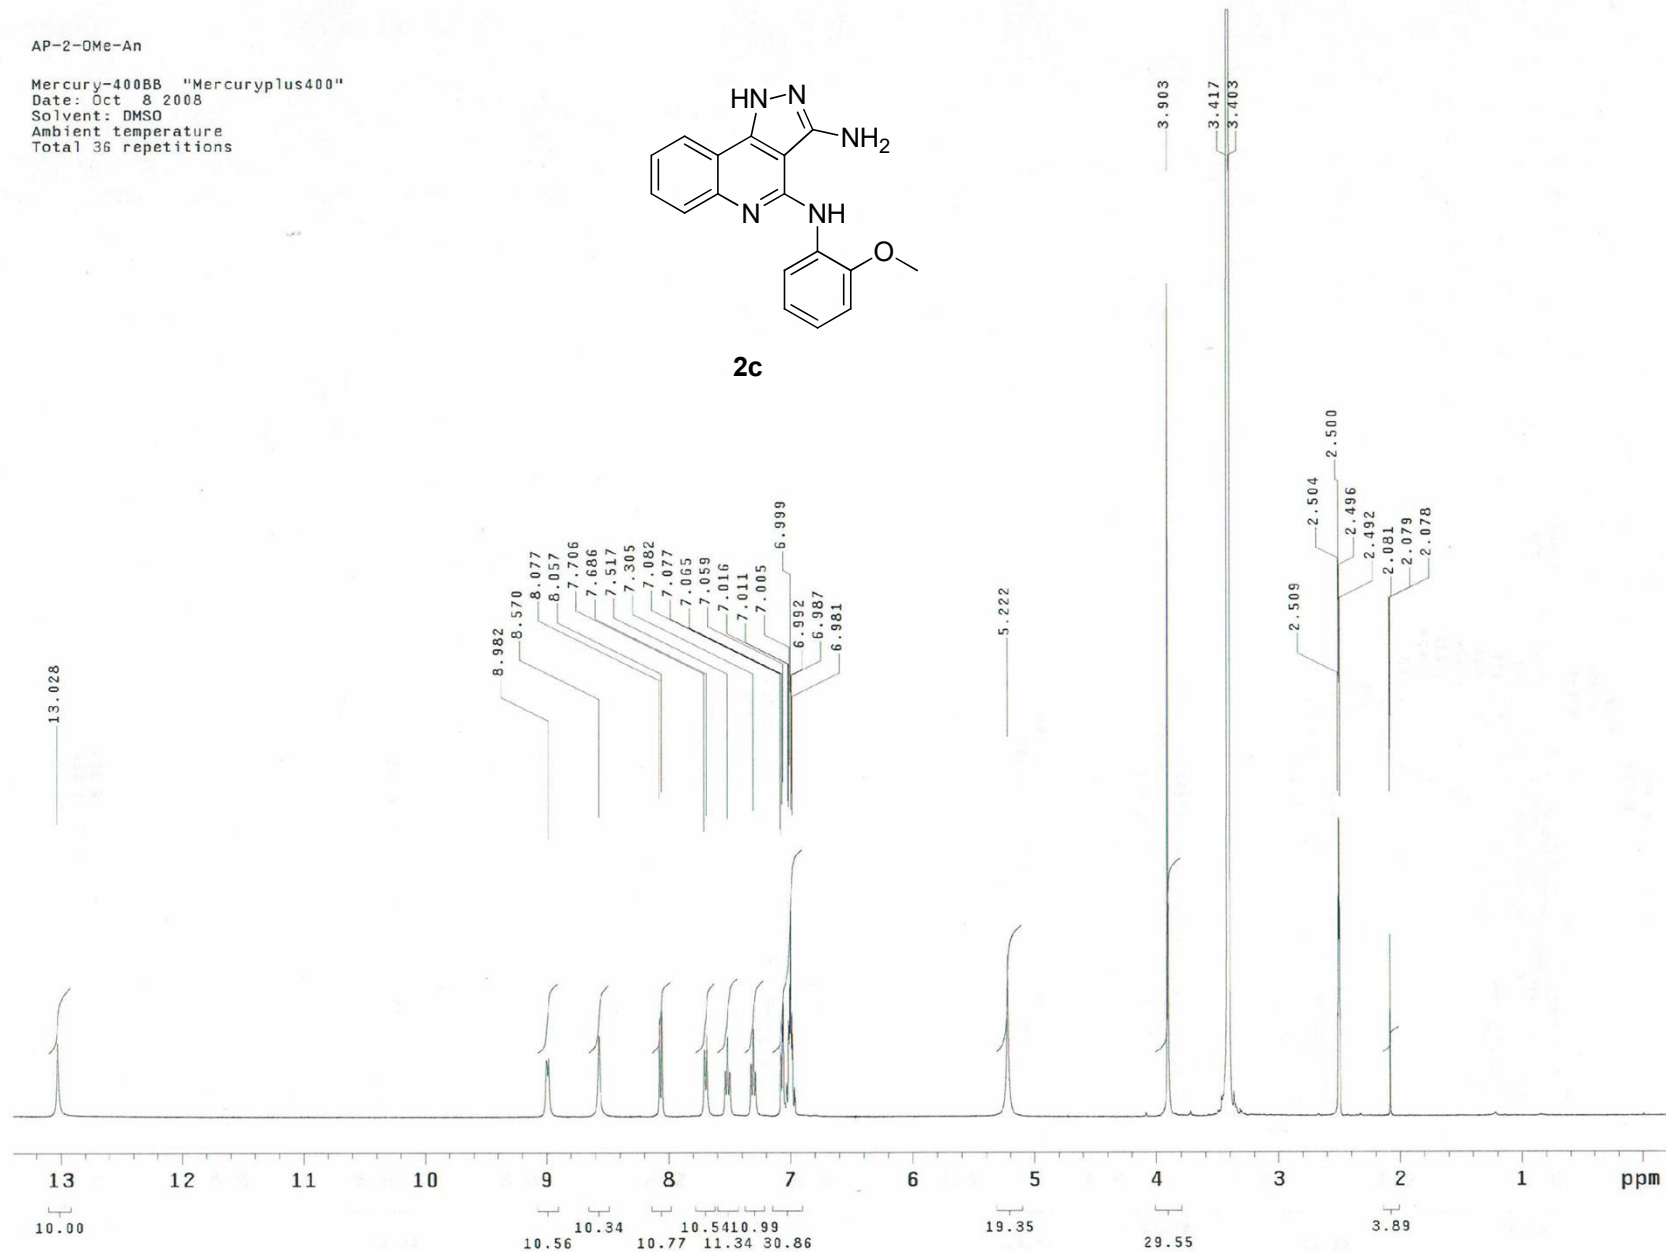

AP-3-OMe-An

Pulse Sequence: s2pu1

UNITYplus-400 "unityplus400"

Date: Oct 28 2008

Solvent: DMSO

Ambient temperature

Total 64 repetitions

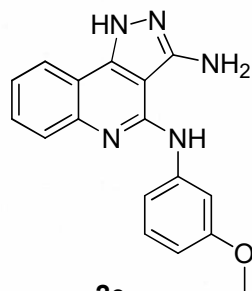

2e

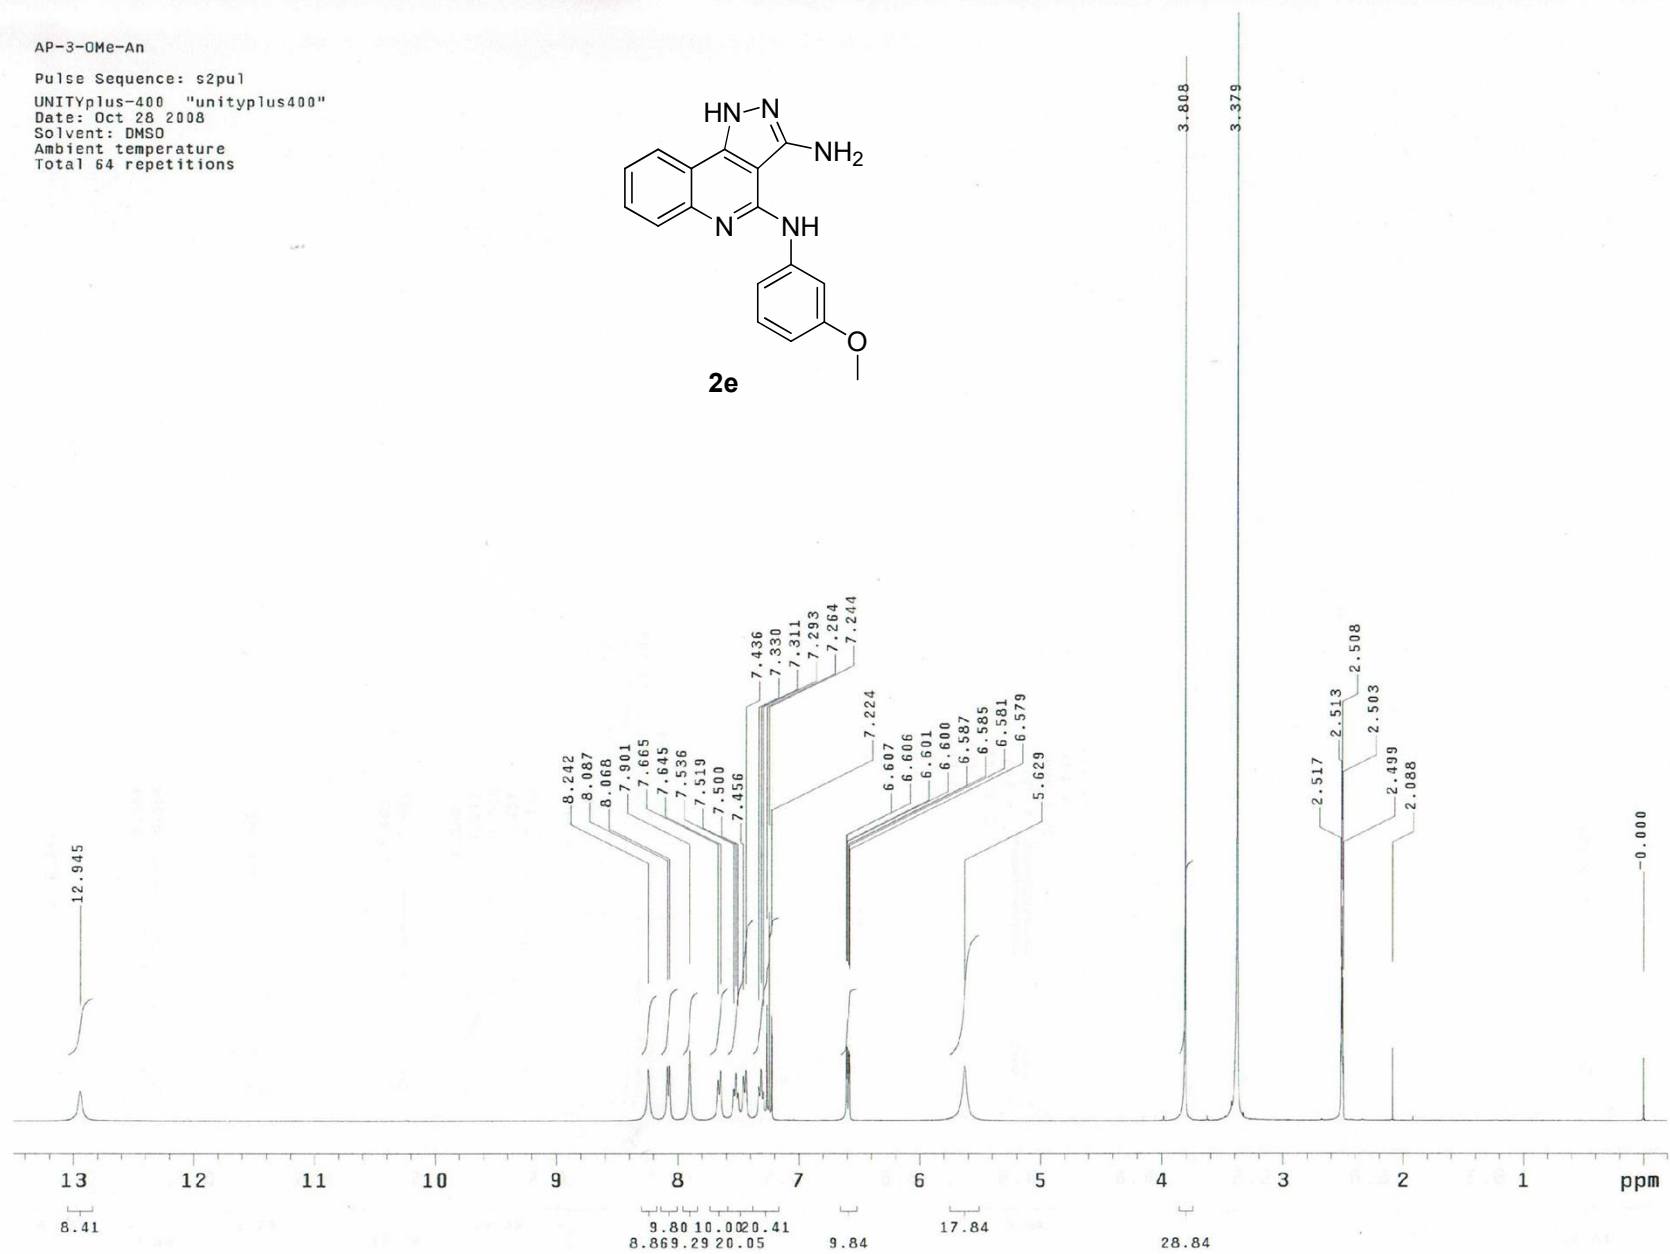

AP-m-COCH3

Pulse Sequence: s2pul

UNITYplus-400 "unityplus400"

Date: Aug 23 2007

Solvent: DMSO

Ambient temperature

Total 64 repetitions

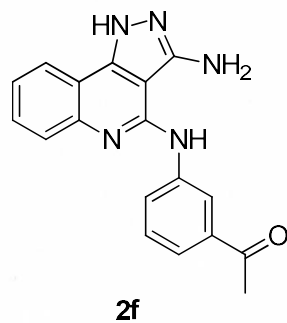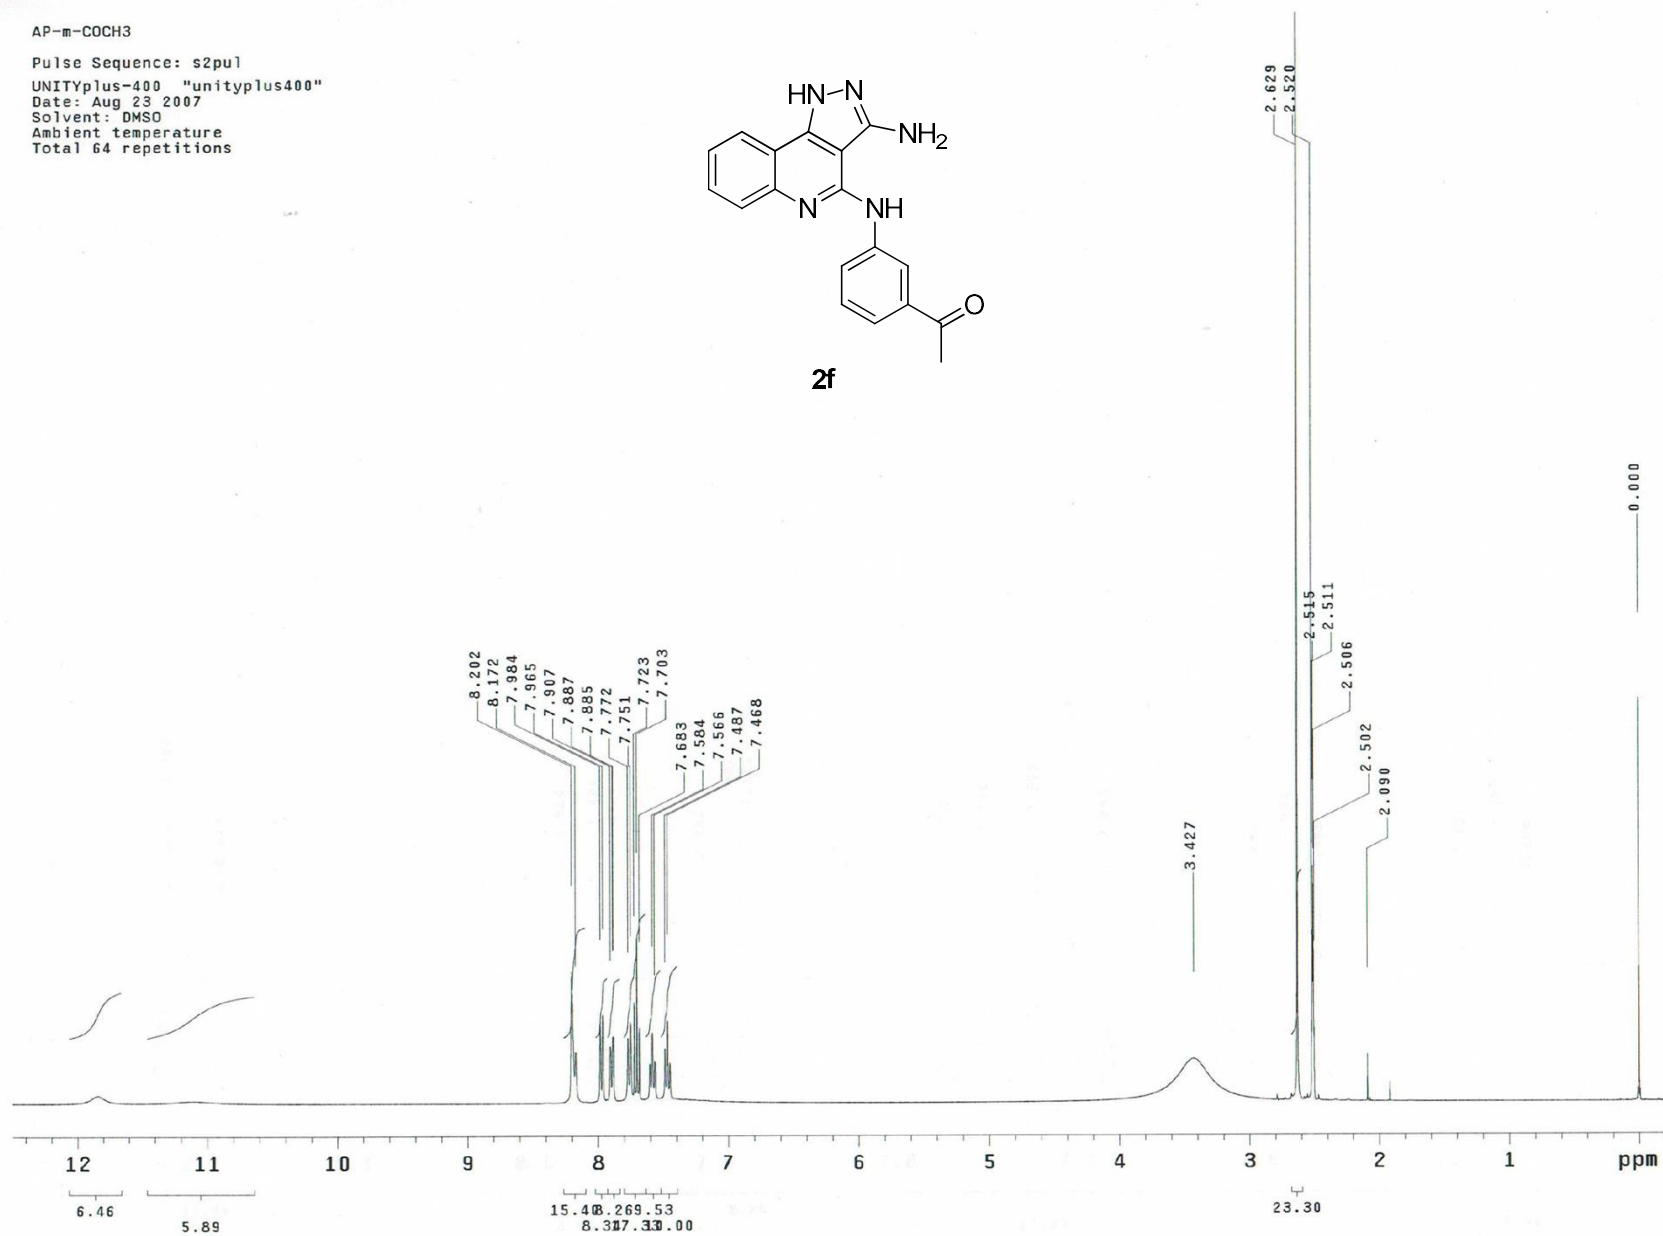

AP-4SMe-An

Mercury-400BB "Mercuryplus400"

Date: Oct 9 2008

Solvent: DMSO

Ambient temperature

Total 36 repetitions

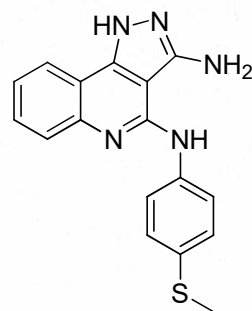

2q

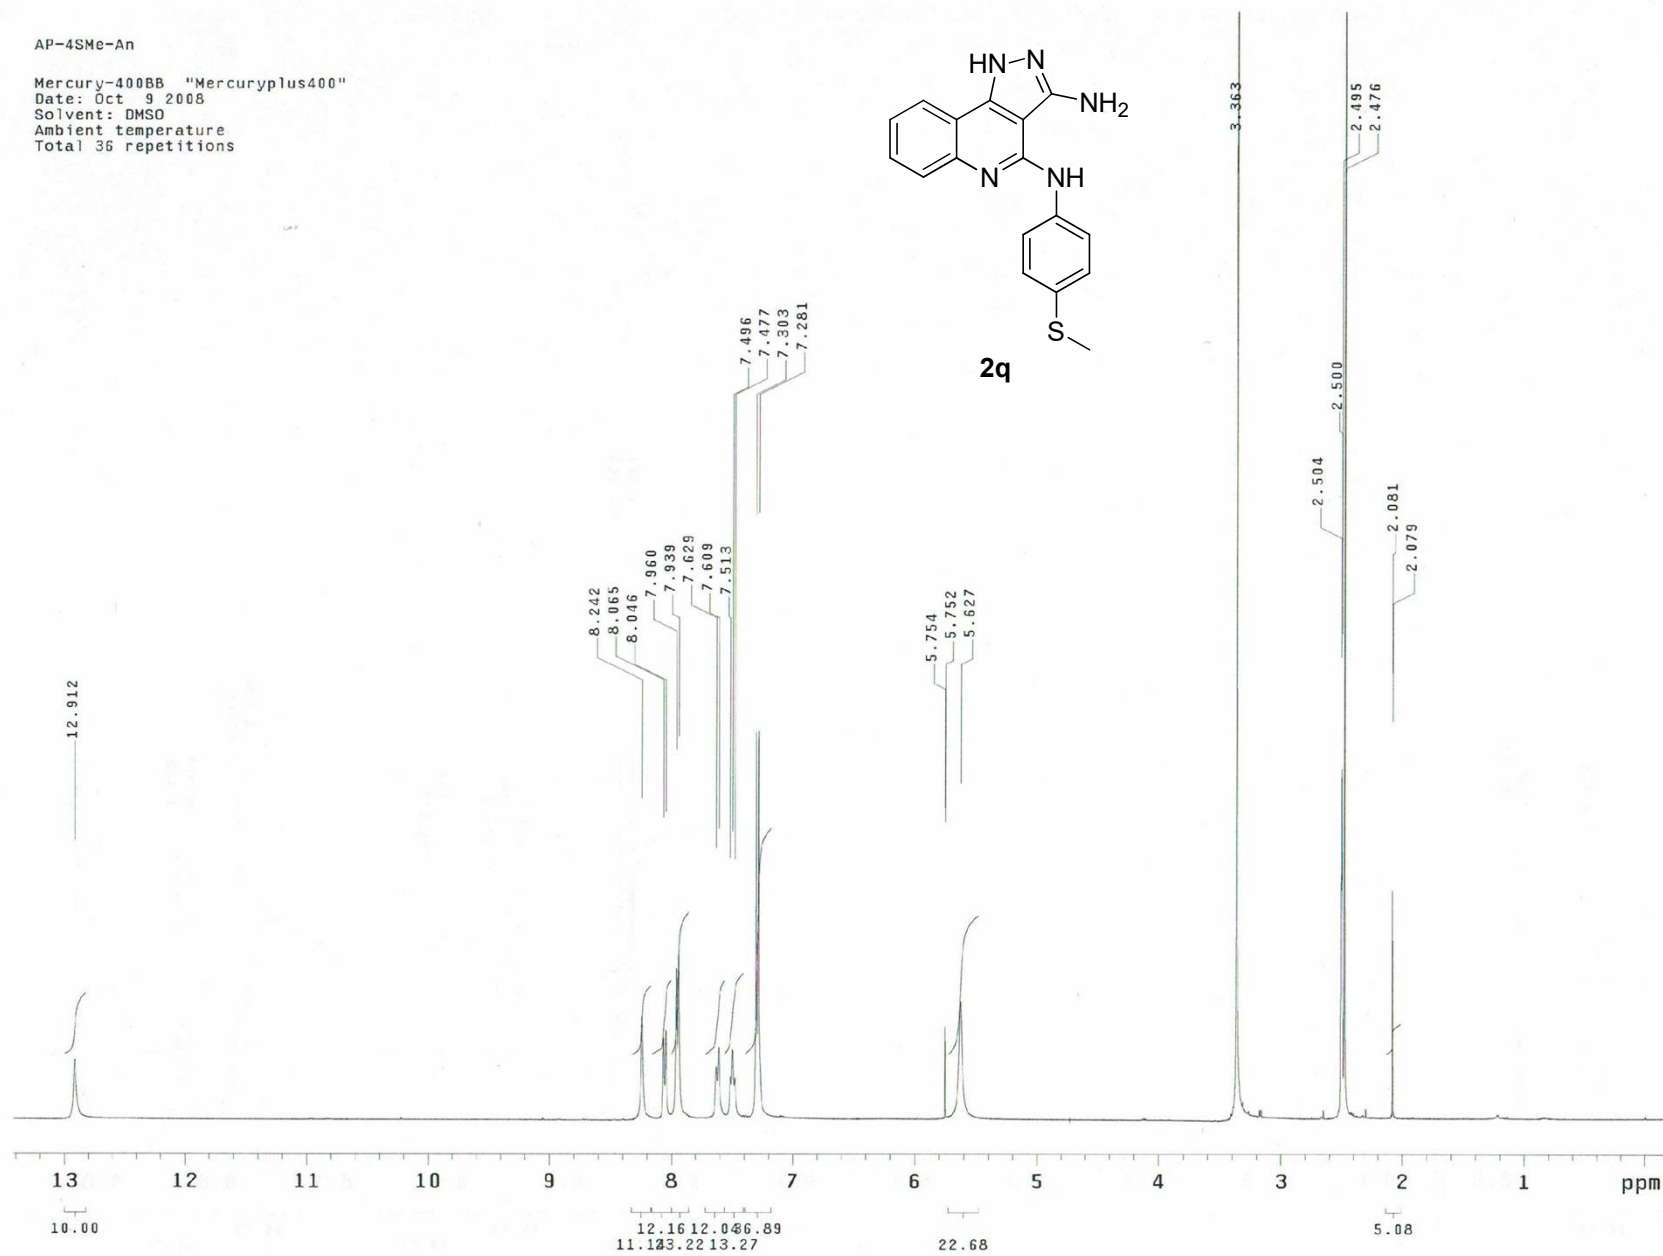

F-triOMe

Pulse Sequence: s2pu1

UNITYplus-400 "unityplus400"

Date: Nov 23 2009

Solvent: DMSO

Ambient temperature

Total 80 repetitions

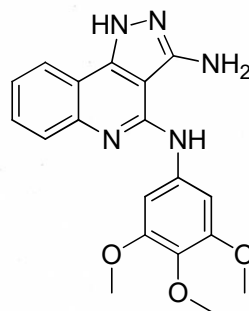

**2r**

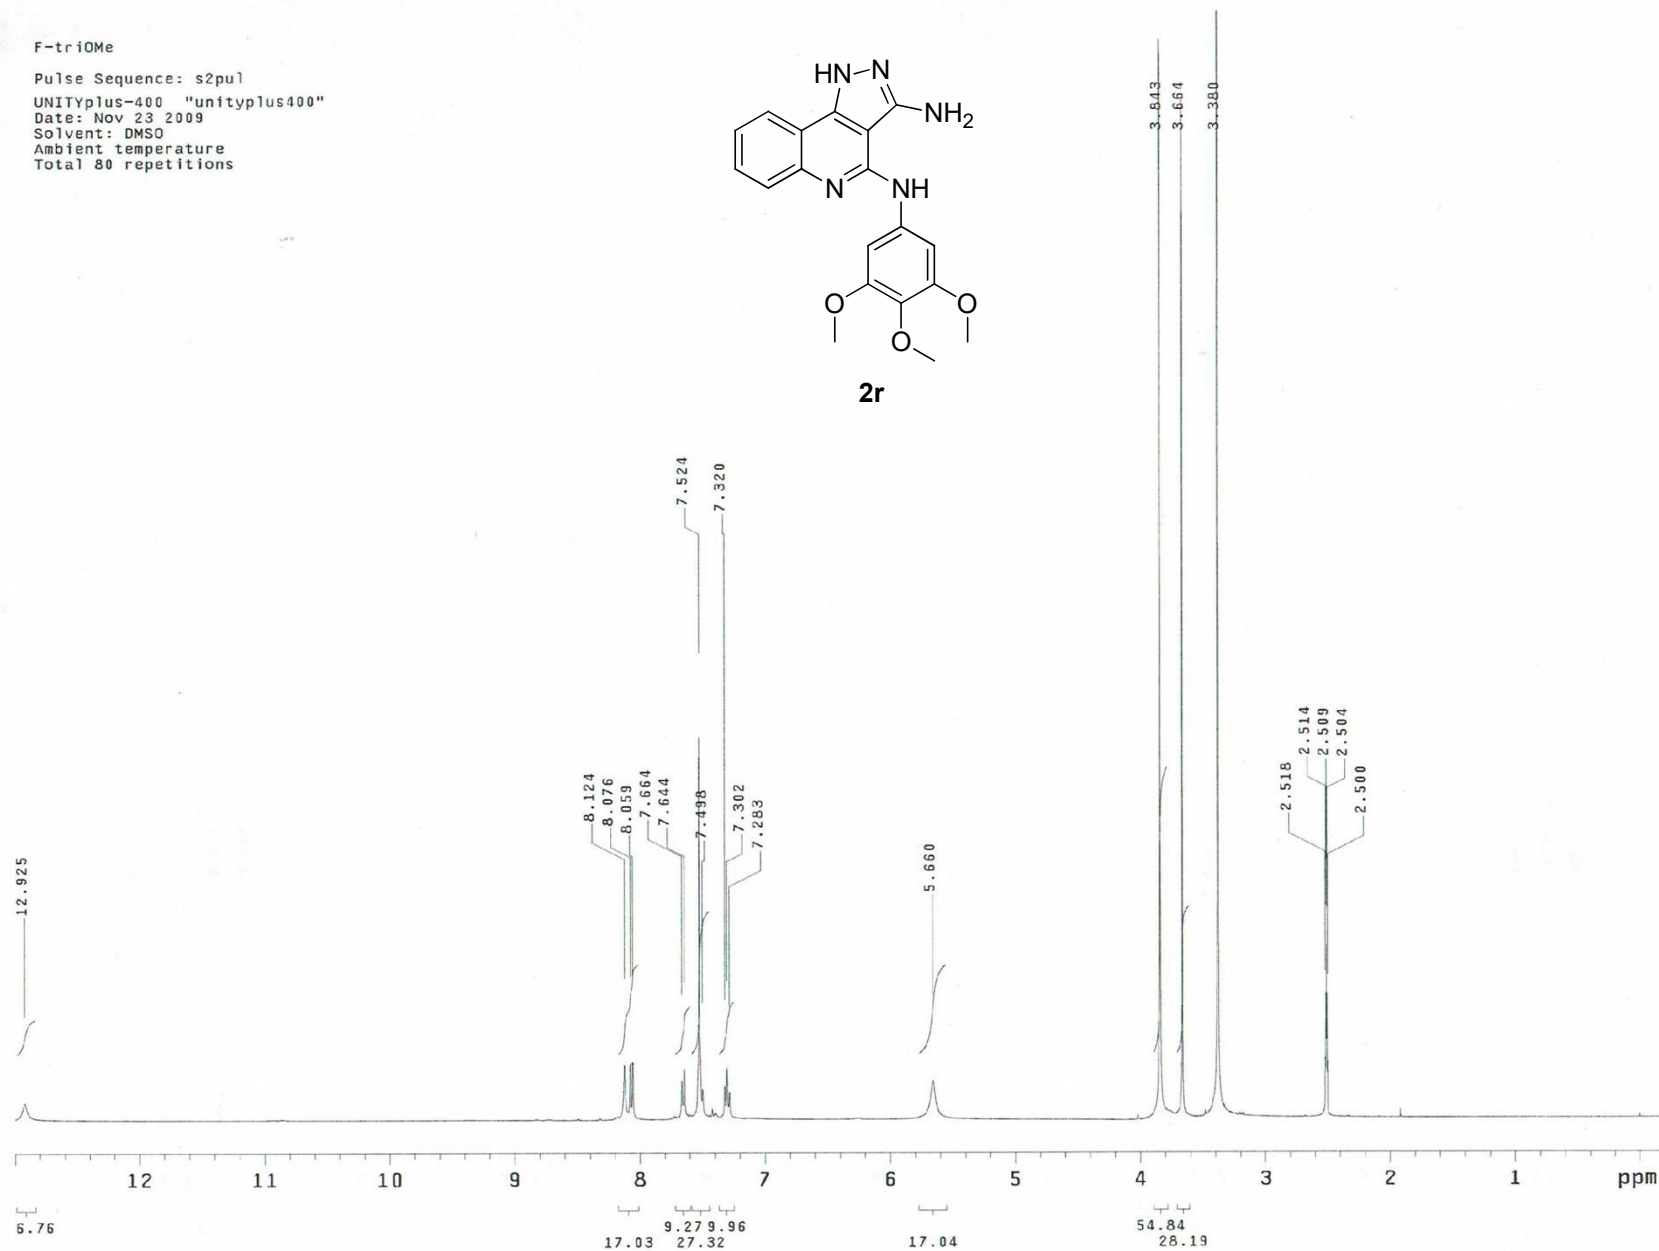

Supplement: s1 [file s1]
